# Supplementary material
Source: Research Square preprint supplement (doi:10.21203/rs.3.rs-9306424/v1)
Supplement: Supplementary file 1 [file a29758617676c9d4589735c4.docx]

**Appendix I: Search strategy**

**Sociological abstracts (ProQuest)**

An initial search was conducted on March 31, 2026, with the filter from >2002, with the following search strategy:

| **Search** | **Query** | **Records retrieved** |
| --- | --- | --- |
| S1 | noft(“asylum seeker*” OR asylee* OR refugee* OR migrant* OR (temporary NEAR/3 worker*) OR "permanent resident*" OR emigrant* OR immigrant* OR nomad* OR foreigner* OR undocumented OR “un-documented” OR transient* OR “displaced person*” OR “displaced people” OR “non-citizen*” OR noncitizen* OR “new-comer*” OR newcomer*) | 140,713 |
| S2 | noft(men OR man OR male* OR mascul* OR manly OR manliness) | 258,445 |
| S3 | noft(Latinx OR Latino* OR “Latin America*” OR “South America*” OR Mexic* OR Guatemala* OR Hondura* "El Salvador" OR Salvador* OR Nicaragua* OR "Costa Rica*" OR Panama* OR Colombia* OR Venezuela* OR Ecuador* OR Peru* OR Bolivia* OR Brazil* OR Paraguay* OR Chile* OR Argentin* OR Uruguay* OR Cuba*) | 198,406 |
| S4 | noft(Canad* OR Ontario OR Quebec OR "British Columbia" OR Alberta OR Manitoba OR Saskatchewan OR "Nova Scotia" OR "New Brunswick" OR "Prince Edward Island" OR Newfoundland OR Labrador OR Yukon OR "Northwest Territories" OR Nunavut) | 133,790 |
| S5 | noft(law OR laws OR legal OR bill OR legislati* OR policy OR policies OR regulation* OR statute* OR "government report*" OR parliament* OR (media NEAR/2 portray*) OR "civil society" OR news) | 647,645 |
| S6 | [S1] AND [S2] AND [S3] AND [S4] AND [S5] AND pd(>20020101) | 26 |

**Appendix II: Draft data extraction instrument**

| **Key elements** | **Reviewer’s response** |
| --- | --- |
| Author(s) |  |
| Year of publication |  |
| Type of literature (e.g., peer-reviewed article, dissertation, government document, parliamentary material, media analysis, civil society report) |  |
| Aim/purpose |  |
| Design/methods (e.g., qualitative, quantitative, legal analysis, discourse analysis, historical analysis, and mixed methods approach) |  |
| Study population |  |
| Migration categories (e.g., TFWP, SAWP, refugee claimant, permanent resident, undocumented, mixed) |  |
| Level of Analysis (Federal/Provincial/Municipal/Transnational) |  |
| Time period studied |  |
| Theoretical or conceptual framework used |  |
| Governance domain(s) addressed (e.g., legal framework, policy implementation, parliamentary debate, political rhetoric, civil society engagement, media coverage) |  |
| Construction of migrant men (e.g., labour productivity, risk/security, vulnerability, family/breadwinner, cultural incompatibility, criminality, integration/assimilation) |  |
| Key concepts examined |  |
| Key findings that relate to the scoping review question |  |
